# Supplementary material
Source: Research Square preprint supplement (doi:10.21203/rs.3.rs-9430187/v1)
Supplement: Supplementary file 1 [file 509786e6d275d194abb548e9.pdf]

# Electronic Supplementary Material

Ecosystem Resilience and Land-Use Governance: Remote Sensing Insights  
for Environmental Management in a Tropical Dry Forest

Lucas Nascimento da Silva

Bartolomeu Israel de Souza

## Supplementary Tables and Figures

Table S1: Description of orbital and climate data collections used (2004–2024).

| Parameter           | Product/Sensor      | Resolution | Source       |
|---------------------|---------------------|------------|--------------|
| Vegetation Indices  | MOD13A1 V6.1        | 500 m      | NASA LP DAAC |
| Reflectance         | MOD09A1 V6.1        | 500 m      | NASA LP DAAC |
| Surface Temp. (LST) | MOD11A2 V6.1        | 1 km       | NASA LP DAAC |
| Evapotranspiration  | MOD16A2GF V6.1      | 500 m      | NASA LP DAAC |
| Precipitation       | CHIRPS Daily        | 0.05°      | UCSB-CHG     |
| Climate Variables   | ERA5-Land           | 0.1°       | ECMWF        |
| Land Use            | MapBiomass Col. 8.0 | 30 m       | MapBiomass   |

Table S2: Maximum Light Use Efficiency ( $\varepsilon_{max}$ ) parameters used in the CASA model for land cover classes (IGBP).

| IGBP Code | Land Cover Class                    | $\varepsilon_{max}$ ( $gC \cdot MJ^{-1}$ ) |
|-----------|-------------------------------------|--------------------------------------------|
| 1         | Evergreen Needleleaf Forest (ENF)   | 0.962                                      |
| 2         | Evergreen Broadleaf Forest (EBF)    | 1.268                                      |
| 3         | Deciduous Needleleaf Forest (DNF)   | 1.086                                      |
| 4         | Deciduous Broadleaf Forest (DBF)    | 1.165                                      |
| 5         | Mixed Forest                        | 1.051                                      |
| 6         | Closed Shrublands                   | 1.281                                      |
| 7         | Open Shrublands                     | 0.841                                      |
| 8         | Woody Savannas                      | 1.239                                      |
| 9         | Savannas                            | 1.206                                      |
| 10        | Grasslands                          | 0.860                                      |
| 12        | Croplands                           | 1.044                                      |
| 14        | Cropland/Natural Vegetation Mosaics | 1.044                                      |

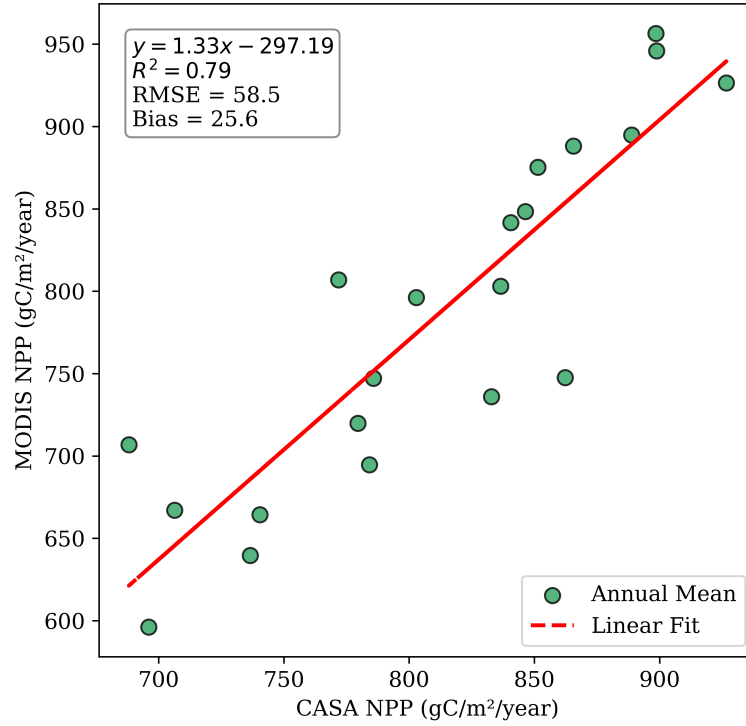

Figure S1: Cross-validation of the estimated CASA model versus MOD17A3HGF product.

Table S3: Top 10 Most Conserved Protected Areas based on Restoration Status.

| Rank | Area Name                 | Governance Type      | Total Area (ha) | Restoration (%) |
|------|---------------------------|----------------------|-----------------|-----------------|
| 1    | Jatobá                    | Quilombola Territory | 197             | 100.00          |
| 2    | Comunidade Aroeira        | Quilombola Territory | 567             | 100.00          |
| 3    | Floresta Nac. de Sobral   | Conservation Unit    | 591             | 100.00          |
| 4    | Maacos                    | Quilombola Territory | 961             | 100.00          |
| 5    | Pitombeira                | Quilombola Territory | 345             | 100.00          |
| 6    | Capoeiras                 | Quilombola Territory | 887             | 100.00          |
| 7    | Res. Extrativista Batoque | Conservation Unit    | 99              | 100.00          |
| 8    | Engenho Bonfim            | Quilombola Territory | 74              | 100.00          |
| 9    | Sabonete                  | Quilombola Territory | 1,897           | 98.70           |
| 10   | Brutos                    | Quilombola Territory | 1,281           | 98.08           |

Table S4: Top 10 Most Degraded Protected Areas based on Degradation Status.

| <b>Rank</b> | <b>Area Name</b>  | <b>Governance Type</b> | <b>Total Area (ha)</b> | <b>Degradation (%)</b> |
|-------------|-------------------|------------------------|------------------------|------------------------|
| 1           | Vicentes          | Quilombola Territory   | 345                    | 100.00                 |
| 2           | Massacara         | Indigenous Land        | 8,082                  | 100.00                 |
| 3           | Karapotó          | Indigenous Land        | 1,060                  | 100.00                 |
| 4           | Catuabo           | Quilombola Territory   | 887                    | 100.00                 |
| 5           | Tuxá de Inajá     | Indigenous Land        | 123                    | 100.00                 |
| 6           | Kapinawá          | Indigenous Land        | 12,444                 | 98.42                  |
| 7           | Araça/Pato/Retiro | Quilombola Territory   | 19,244                 | 94.75                  |
| 8           | Lagoa do Peixe    | Quilombola Territory   | 6,530                  | 94.34                  |
| 9           | Xukuru de Cimbres | Indigenous Land        | 1,158                  | 93.62                  |
| 10          | Sítio Arruda      | Quilombola Territory   | 370                    | 93.33                  |
